# Supplementary material for: Rapid SO 2 emission reductions significantly increase tropospheric ammonia concentrations over the North China Plain
Source: Copernicus journal article supplement (doi:10.5194/acp-18-17933-2018), 2018-12-18
Supplement: Supplementary file 1 [file acp-18-17933-2018-supplement.pdf]

Supplement of Atmos. Chem. Phys., 18, 17933–17943, 2018  
<https://doi.org/10.5194/acp-18-17933-2018-supplement>  
© Author(s) 2018. This work is distributed under  
the Creative Commons Attribution 4.0 License.

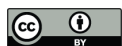

*Supplement of*

## **Rapid SO<sub>2</sub> emission reductions significantly increase tropospheric ammonia concentrations over the North China Plain**

**Mingxu Liu et al.**

*Correspondence to:* Yu Song (songyu@pku.edu.cn), Min Hu (minhu@pku.edu.cn) and Tong Zhu (tzhu@pku.edu.cn)

The copyright of individual parts of the supplement might differ from the CC BY 4.0 License.

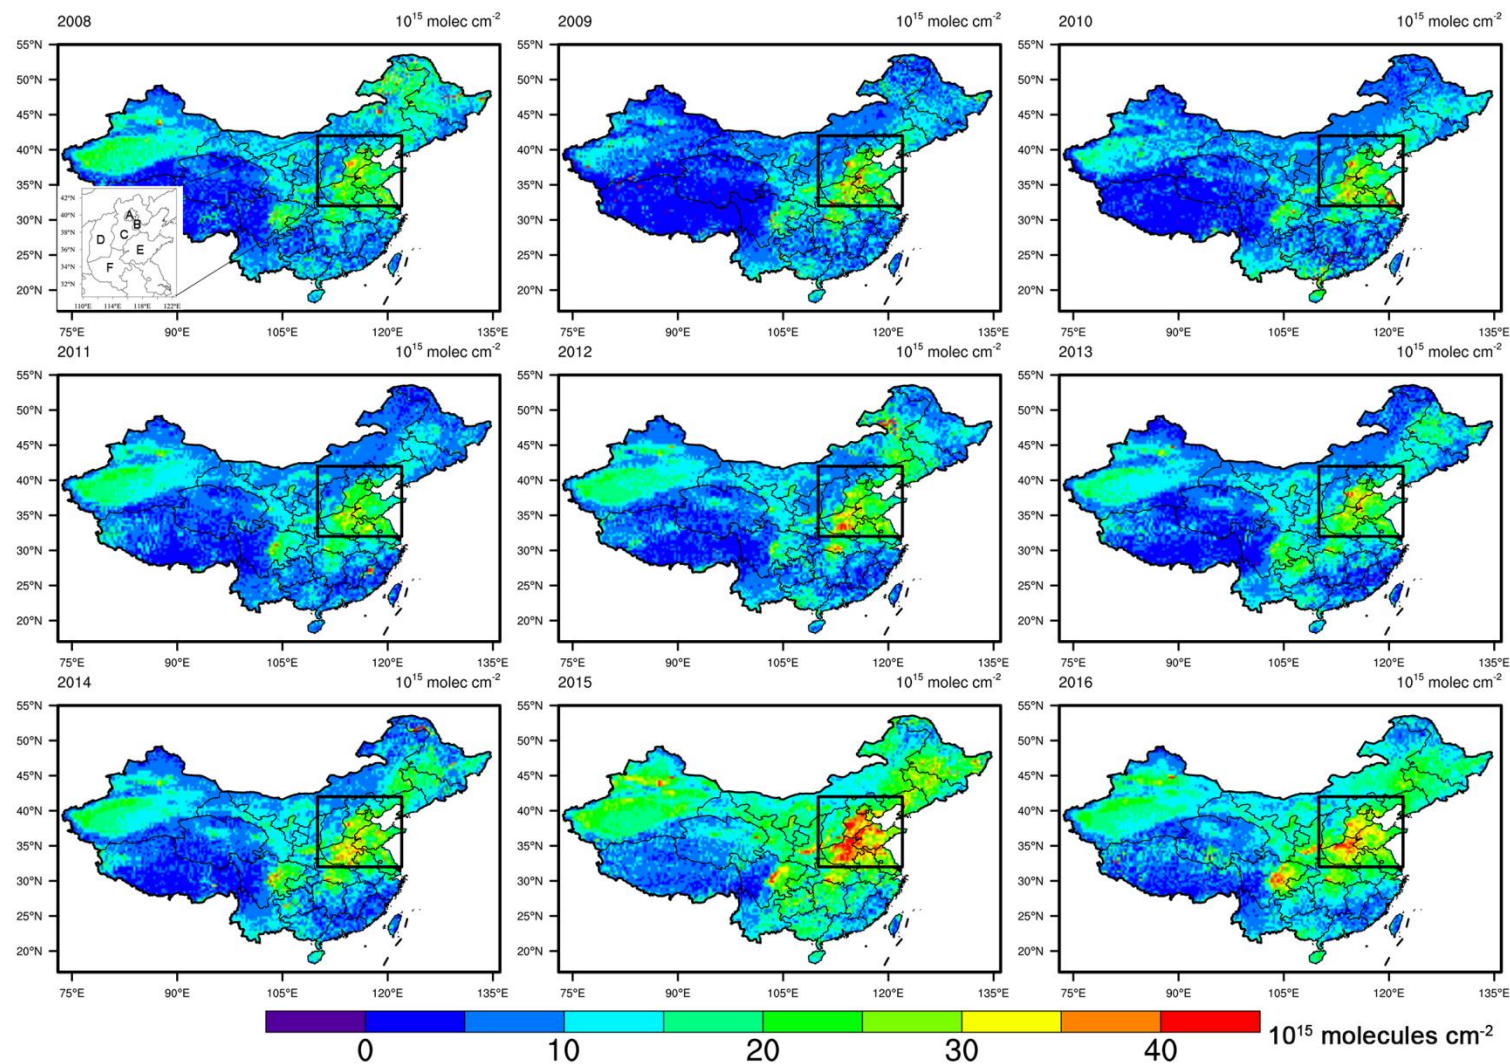

**Figure S1.** Spatial distribution of  $\text{NH}_3$  column densities in mainland China observed by IASI sensor from 2008 to 2016. The area of interest in this study includes Beijing (A), Tianjin (B), Hebei (C), Shanxi (D), Shandong (E) and Henan (F) Provinces, as marked in the black rectangle. The small islands in South China Sea are not included in the figure.

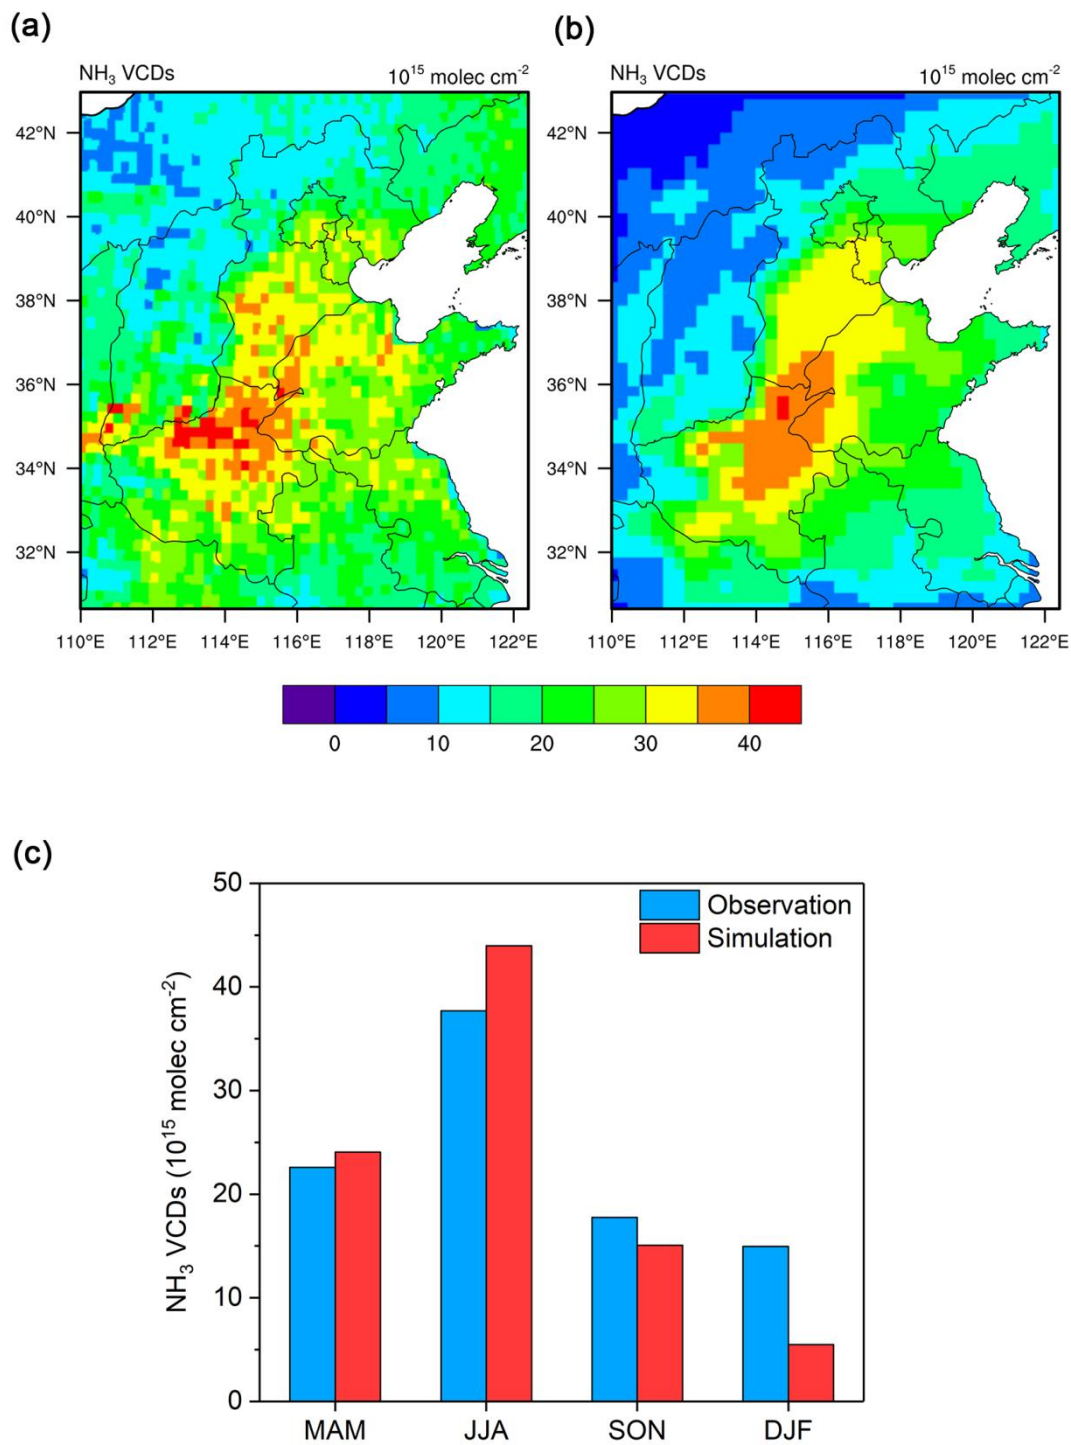

**Figure S2.** Spatial distribution of satellite observations (a) and modelled tropospheric  $\text{NH}_3$  column densities (b) for the year of 2016; (c) comparison of the regional mean  $\text{NH}_3$  column densities between observations and simulations among different seasons in 2016.

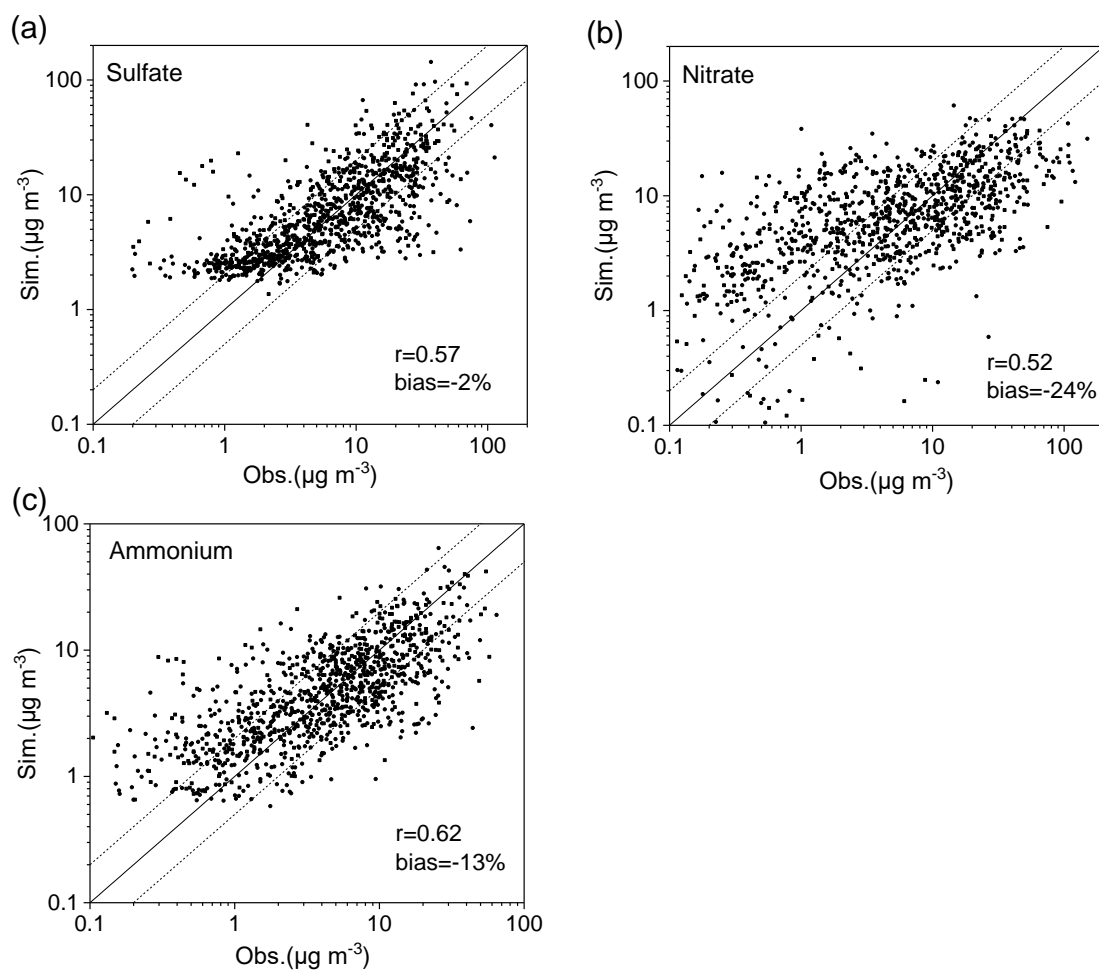

**Figure S3.** Comparison of modelled PM<sub>2.5</sub> sulfate (a), nitrate (b) and ammonium (c) concentrations with corresponding daily measurements of PM<sub>2.5</sub> from 2014 to 2016 over North China Plain. The model results were extracted from the first model level (~25m aboveground) and averaged at one day. The Pearson correlation coefficients and normalized mean bias are shown inset.

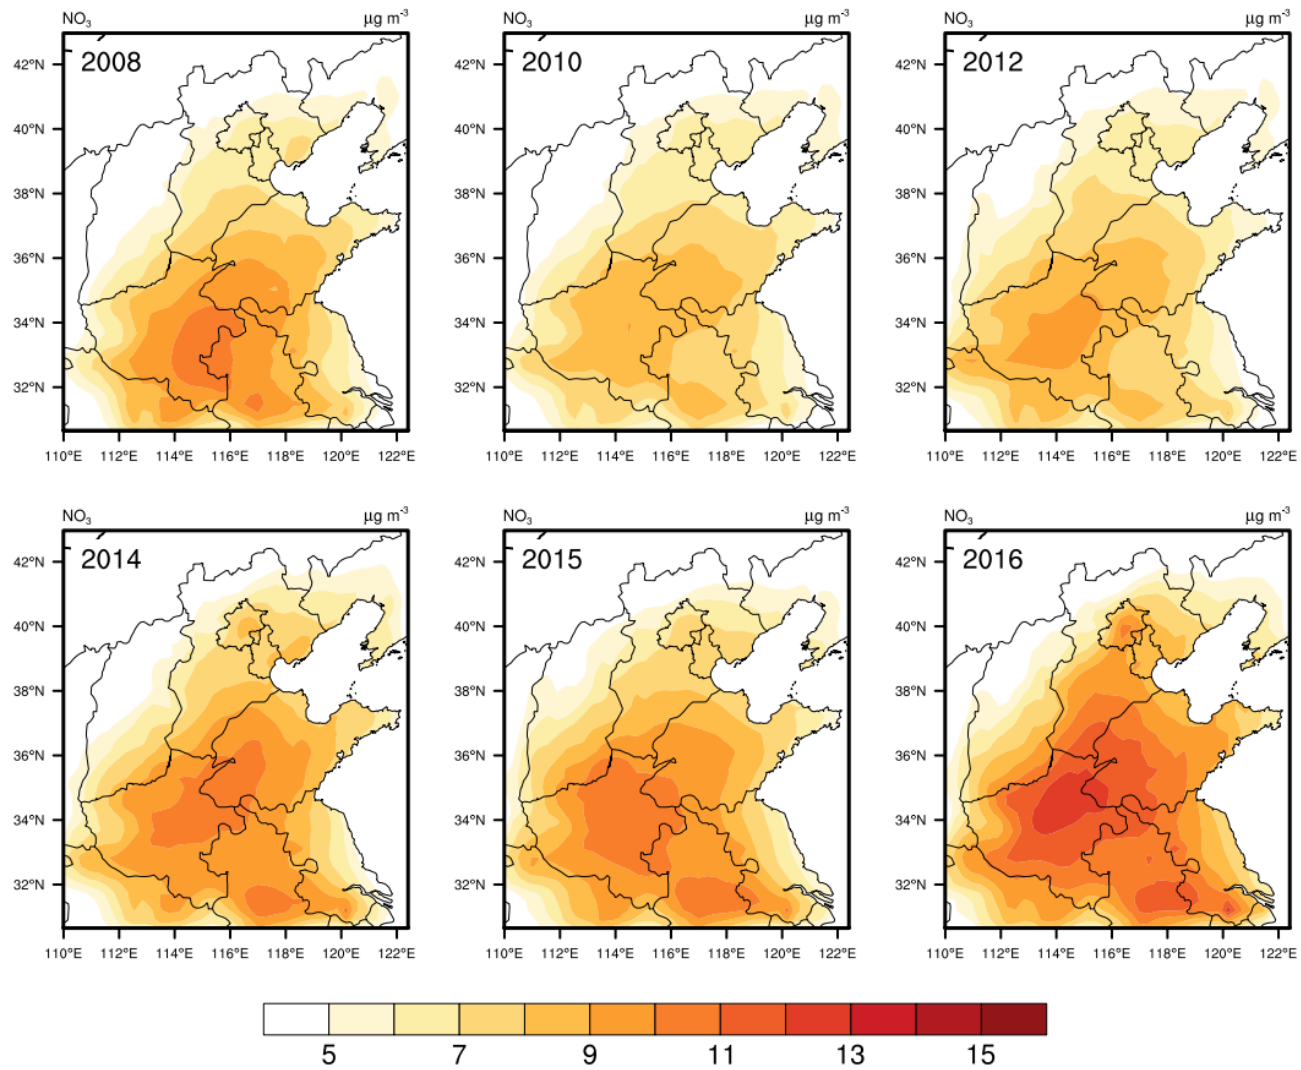

**Figure S4.** The simulated annual-mean concentrations of PM<sub>2.5</sub>-nitrate ( $\mu\text{g m}^{-3}$ ) over Northern China in recent years.

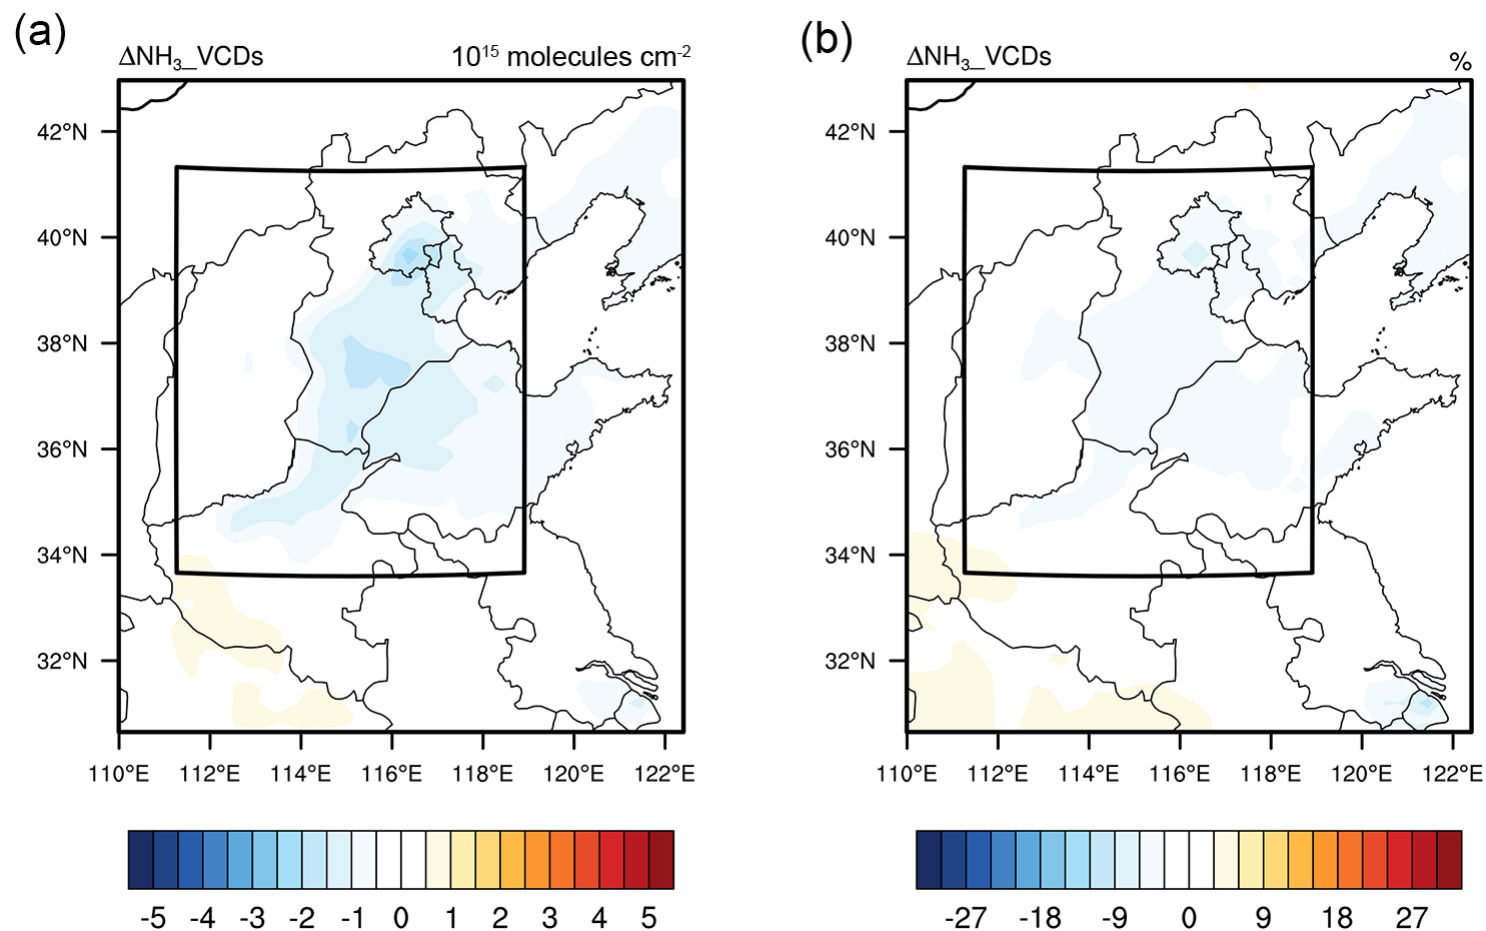

**Figure S5.** Absolute (a) and percent (b) changes in the simulated column concentrations of  $\text{NH}_3$  between the Run\_16\_N08 ( $\text{NO}_x$  emissions in 2008) and Run\_16 cases. Negative values denote decreases in  $\text{NH}_3$  VCDs due to the change in  $\text{NO}_x$  emissions during 2008–2016. The black box represents the major area of interest in this study.

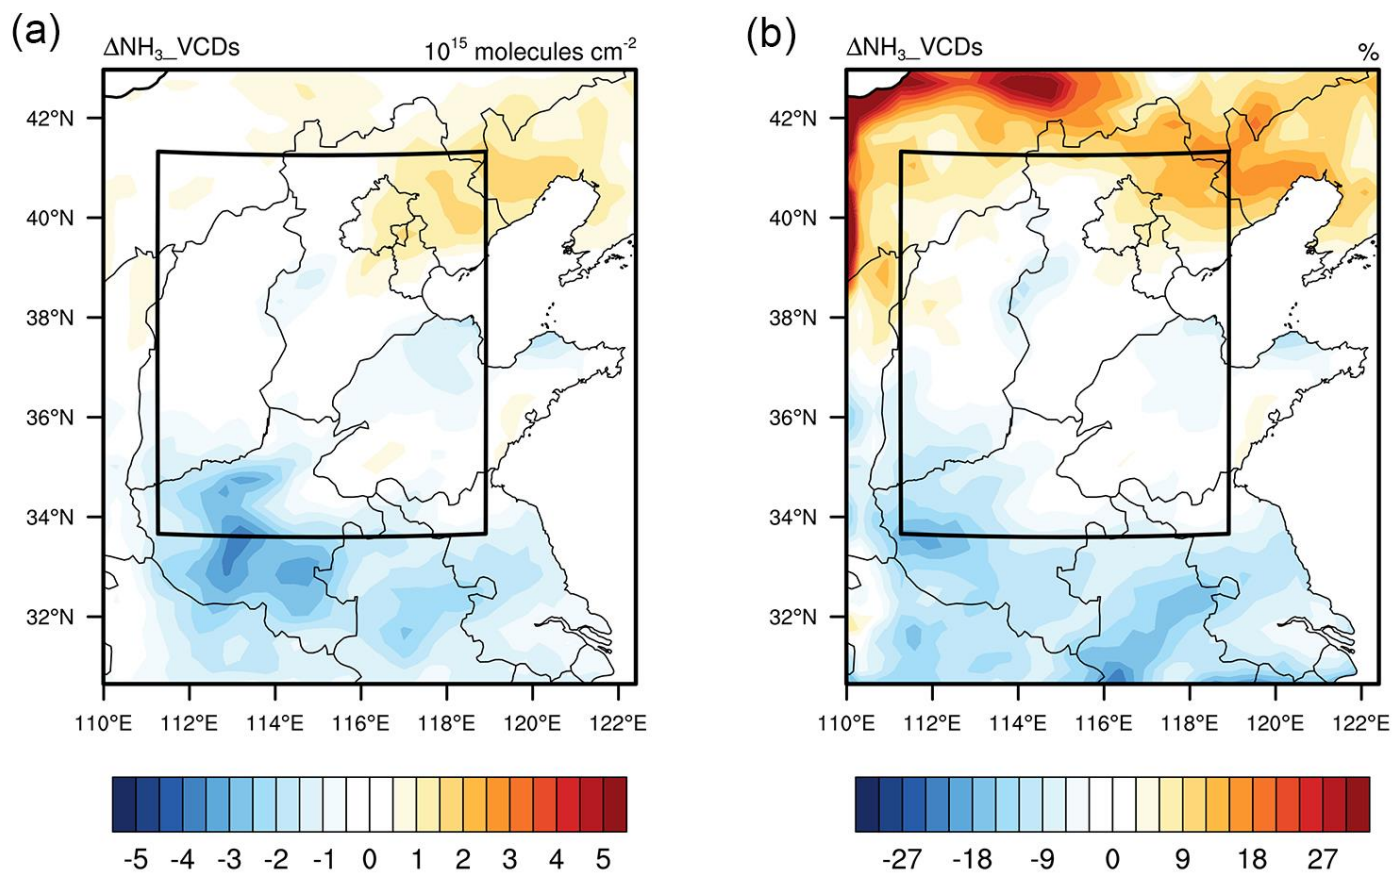

**Figure S6.** Absolute (a) and percent (b) changes in the simulated column concentrations of  $\text{NH}_3$  between the Run\_12 and Run\_12\_16M. Negative values denote decreases due to the change in meteorological fields in the Run\_12\_16M. The black box represents the major area of interest in this study.

**Table S1** Annual consumption of synthetic fertilizers, populations of major livestock animals and the proportions of the intensive system in livestock animal rearing in Northern China from 2008 to 2016.

|                                                                                 | 2008 | 2009 | 2010 | 2011 | 2012 | 2013 | 2014 | 2015 | 2016 |
|---------------------------------------------------------------------------------|------|------|------|------|------|------|------|------|------|
| Fertilizers (Ton) <sup>1</sup>                                                  |      |      |      |      |      |      |      |      |      |
| ammonium bicarbonate                                                            | 146  | 128  | 99   | 108  | 107  | 99   | 61   | 54   | 42   |
| Urea                                                                            | 477  | 489  | 520  | 506  | 507  | 509  | 538  | 532  | 523  |
| Compound Fertilizer                                                             | 120  | 127  | 135  | 140  | 145  | 149  | 160  | 163  | 168  |
| Animals (Million) <sup>2</sup>                                                  |      |      |      |      |      |      |      |      |      |
| Beef                                                                            | 18.2 | 17.4 | 16.1 | 15.1 | 14.7 | 14.6 | 14.6 | 15.0 | 14.6 |
| Dairy                                                                           | 3.5  | 3.6  | 4.3  | 4.7  | 4.9  | 4.8  | 5.1  | 5.0  | 4.8  |
| Goat                                                                            | 49.2 | 45.4 | 43.4 | 42.8 | 42.1 | 42.1 | 43.0 | 44.2 | 37.8 |
| Sheep                                                                           | 17.3 | 19.7 | 19.3 | 20.6 | 21.3 | 22.1 | 23.2 | 23.1 | 26.9 |
| Pig                                                                             | 132  | 139  | 143  | 142  | 151  | 157  | 164  | 160  | 155  |
| Poultry                                                                         | 3056 | 3141 | 3209 | 3369 | 3658 | 3605 | 3424 | 3504 | 3635 |
| Proportion of the intensive system in livestock animal rearing (%) <sup>2</sup> | 28   | 32   | 35   | 37   | 39   | 41   | 43   | 46   | 46   |

<sup>1</sup> Values were derived from China Agriculture Yearbook (2008–2016) and Cost and Income of Chinese Farm Produce (2008–2016). <sup>2</sup> Values were derived from China Animal Industry Yearbook (2008–2016). The references for these data can be also found in Kang et al. (2016).



## ***References:***

China Agriculture Yearbook 2008–2016 China Agriculture Press, Beijing (in Chinese).

Cost and Income of Chinese Farm Produce 2008–2016, China Statistics Press, Beijing (in Chinese).

China Animal Industry Yearbook 1999–2013, China Agriculture Press, Beijing (in Chinese).

Kang, Y., Liu, M., Song, Y., Huang, X., Yao, H., Cai, X., Zhang, H., Kang, L., Liu, X., Yan, X., He, H., Zhang, Q., Shao, M., and Zhu, T.: High-resolution ammonia emissions inventories in China from 1980 to 2012, *Atmos. Chem. Phys.*, 16, 2043-2058, 10.5194/acp-16-2043-2016, 2016.
